# Supplementary material
Source: Springer Nature journal article supplement (https://www.springermedizin.de/resource/supplementary/12970_2013_415_MOESM4_ESM.pdf/9593906)

### A: CK

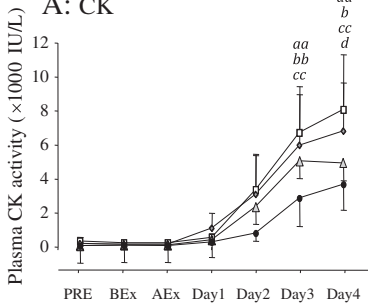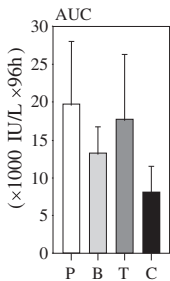

### B: LDH

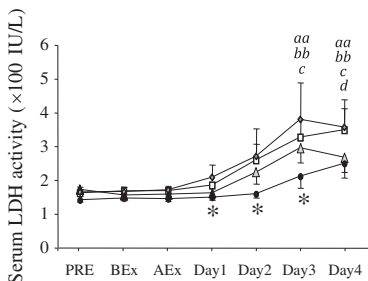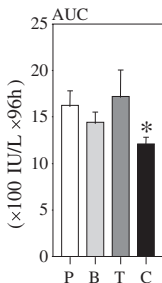

### C: aldolase

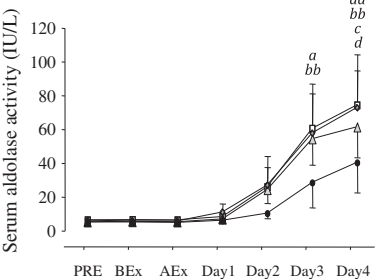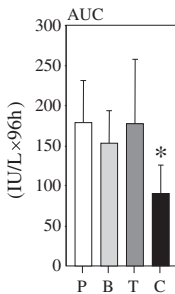

□ PLCB (P)    △ BA (B)    ◆ TAU (T)    ● COMB (C)

Supplement: MOESM4 [file 9593906]
